# Supplementary material
Source: Research Square preprint supplement (doi:10.21203/rs.3.rs-8682836/v1)
Supplement: Supplementary file 2 [file fc86652115564ec06266fc13.xlsx]

## Sheet: GRIPP2
GRIPP-2 Checklist
Abstract of paper		Page Number
Item	GRIPP-2 Requirement
1a: Aim	Report the aim of the study	4-5
1b: Methods	Describe the methods used by which patients and the public were involved	4-5
1c: Results	Report the impacts and outcomes of PPI in the study	N/A
1d:Conclusions	Summarise the main conclusions of the study	N/A
1e: Keywords	Include PPI, “patient and public involvement,” or alternative terms as keywords	1
2. Background to paper
Item	GRIPP-2 Requirement
2a: Definition	Report the definition of PPI used in the study and how it links to comparable studies	13-15
2b: Theoretical underpinnings	Report the theoretical rationale and any theoretical influences relating to PPI in the study	13-15
2c: Concepts and theory development	Report any conceptual or theoretical models, or influences, used in the study	13-15
3. Aims of paper
Item	GRIPP-2 Requirement
3: Aim	Report the aim of the study	6
4. Methods of paper
Item	GRIPP-2 Requirement
4a: Design	Provide a clear description of methods by which patients and the public were involved	13-15
4b: People involved	Provide a description of patients, carers, and the public involved with the PPI activity in the study	13-15
4c: Stages of involvement	Report on how PPI is used at different stages of the study	13-15
4d: Level or nature of involvement	Report the level or nature of PPI used at various stages of the study	13-15
5. Capture or measurement of PPI impact
Item	GRIPP-2 Requirement
5a: Qualitative evidence of impact	If applicable, report the methods used to qualitatively explore the impact of PPI in the study	13-15
5b: Quantitative evidence of impact	If applicable, report the methods used to quantitatively measure or assess the impact of PPI	13-15
5c: Robustness of measure	If applicable, report the rigour of the method used to capture or measure the impact of PPI	13-15
6. Economic assessment
Item	GRIPP-2 Requirement
6: Economic assessment	If applicable, report the method used for an economic assessment of PPI	N/A
7. Study results
Item	GRIPP-2 Requirement
7a: Outcomes of PPI	Report the results of PPI in the study, including both positive and negative outcomes	N/A
7b: Impacts of PPI	Report the positive and negative impacts that PPI has had on the research, the individuals involved (including patients and researchers), and wider impacts	N/A
7c: Context of PPI	Report the influence of any contextual factors that enabled or hindered the process or impact of PPI	N/A
7d: Process of PPI	Report the influence of any process factors, that enabled or hindered the impact of PPI	N/A
7ei: Theory development	Report any conceptual or theoretical development in PPI that have emerged	N/A
7eii: Theory development	Report evaluation of theoretical models, if any	N/A
7f: Measurement	If applicable, report all aspects of instrument development and testing (eg, validity, reliability, feasibility, acceptability, responsiveness, interpretability, appropriateness, precision)	N/A
7 g: Economic assessment	Report any information on the costs or benefit of PPI	N/A
8. Discussion and conclusions
Item	GRIPP-2 Requirement
8a: Outcomes	Comment on how PPI influenced the study overall. Describe positive and negative effects	N/A
8b: Impacts	Comment on the different impacts of PPI identified in this study and how they contribute to new knowledge	N/A
8c: Definition	Comment on the definition of PPI used (reported in the Background section) and whether or not you would suggest any changes	N/A
8d: Theoretical underpinnings	Comment on any way your study adds to the theoretical development of PPI	N/A
8e: Context	Comment on how context factors influenced PPI in the study	N/A
8f: Process	Comment on how process factors influenced PPI in the study	N/A
8 g: Measurement and capture of PPI impact	If applicable, comment on how well PPI impact was evaluated or measured in the study	N/A
8 h: Economic assessment	If applicable, discuss any aspects of the economic cost or benefit of PPI, particularly any suggestions for future economic modelling.	N/A
8i: Reflections/critical perspective	Comment critically on the study, reflecting on the things that went well and those that did not, so that others can learn from this study	N/A
